# Supplementary material for: GAM: a web-service for integrated transcriptional and metabolic network analysis
Source: PubMed Central journal article supplement — Nucleic Acids Res. 2016 Apr 20;44(Web Server issue):W194–200. doi: 10.1093/nar/gkw266 (PMC4987878; doi:10.1093/nar/gkw266), 2016-04-20
Supplement: supp_gkw266_nar-00366-web-b-2016-File008.pdf [file supp_gkw266_nar-00366-web-b-2016-File008.pdf]

# Regulation of gene expression by glucose metabolism in mammary cell lines

## Input files

We analyzed control vs 2-deoxy-glucose (2DG) treated mammary epithelial cells (MCF10A). Data was acquired from GEO Omnibus GSE59228.

File with differential expression (DE) for genes:

[https://artyomovlab.wustl.edu/publications/supp\\_materials/GAM\\_2015/MCF10A.Ctrl.vs.2DG.G.gene.de.tsv](https://artyomovlab.wustl.edu/publications/supp_materials/GAM_2015/MCF10A.Ctrl.vs.2DG.gene.de.tsv)

DE table consists of 20285 genes. No cutoff for expression was applied.

## Module

We ran GAM analysis with default parameters (reactions as nodes, collapsing reactions, not solving to optimality) and  $\log\text{FDR}=-10$  (Fig. 1).

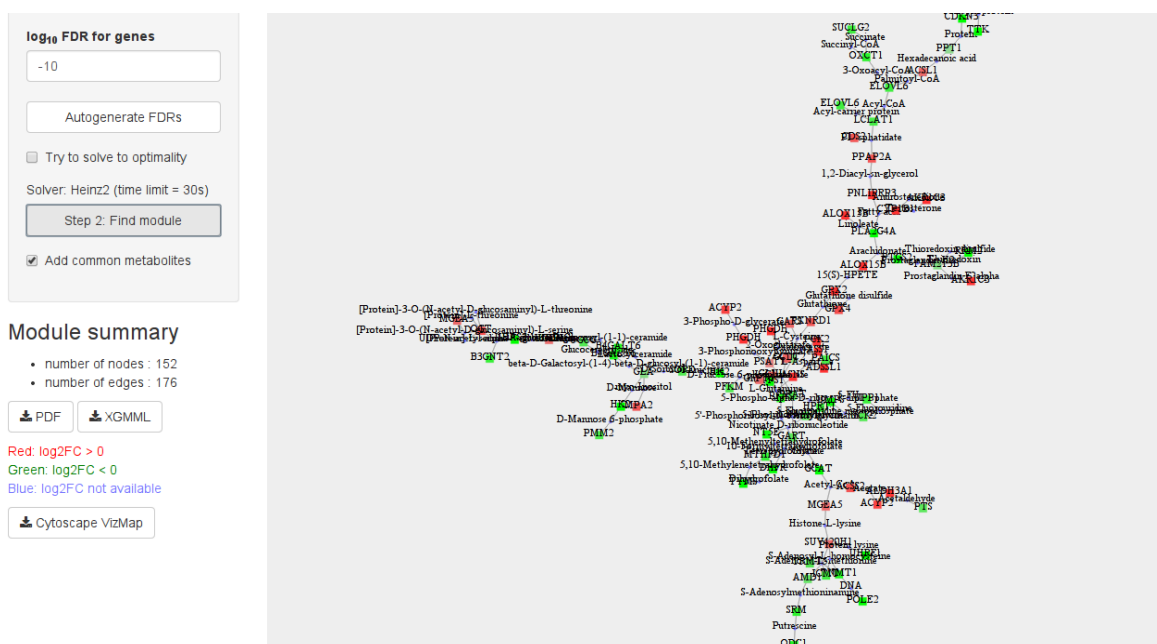

**Fig. 1.** Overview of a module for 2DG treated cells.

2DG treatment blocks glycolysis and results in the same effects as glucose deprivations. The analysis highlighted three major up-regulated features (Fig 2): 1) up-regulation of glutathione redox control locus; and 2) usage of glutamine via glutaminolysis. Importantly, these features have been documented as characteristic for glucose starved cells

(<http://www.ncbi.nlm.nih.gov/pubmed/12767261>,
